# Supplementary material
Source: ML conference proceedings conference paper supplement (https://proceedings.mlr.press/v48/yenb16.html)
Supplement: Supplementary file [file yenb16-supp.pdf]

## 6. Appendix A: Convergence Proof

The proofs of Theorem 1, 2 are similar to that in (Lacoste-Julien et al., 2013). To be self-contained, we provide proofs in the following.

### 6.1. Proof for Theorem 1

The dual problem (14) has (generalized) Hessian for  $i$ -th block of variable  $\alpha^i$  being upper bounded by

$$\nabla_{\alpha^i}^2 G(\alpha) \preceq Q_i I.$$

where  $Q_i = \|\mathbf{x}_i\|^2$ . Since the active set includes the most-violating pair (19) that defines the Frank-Wolfe direction  $\alpha_{FW}^t$  satisfying (18), the update given by solving the active-set subproblem (21) has

$$\begin{aligned} G(\alpha^{t+1}) - G(\alpha^t) &\leq \gamma \langle \nabla_{\alpha^i} G(\alpha^t), \alpha_{FW}^{it} - \alpha^{it} \rangle + \frac{Q_i \gamma^2}{2} \|\alpha_{FW}^{it} - \alpha^{it}\|^2 \\ &\leq \gamma \langle \nabla_{\alpha^i} G(\alpha^t), \alpha_{FW}^{it} - \alpha^{it} \rangle + \frac{Q_i R^2 \gamma^2}{2} \end{aligned}$$

for any  $\gamma \in [0, 1]$ , where  $\|\alpha_{FW}^{it} - \alpha^{it}\|^2 \leq R^2 = 4C^2$  since both  $\alpha_{FW}^{it}, \alpha^{it}$  lie within the domain (16). Taking expectation w.r.t.  $i$  (uniformly sampled from  $[N]$ ), we have

$$\begin{aligned} E[G(\alpha^{t+1})] - G(\alpha^t) &\leq \frac{\gamma}{N} \langle \nabla_{\alpha} G(\alpha^t), \alpha_{FW}^t - \alpha^t \rangle + \frac{QR^2\gamma^2}{2N} \end{aligned} \quad (31)$$

where  $Q = \sum_{i=1}^N Q_i$ . Then denote  $\alpha^*$  as an optimal solution, by convexity and the definition of Frank-Wolfe direction we have

$$\begin{aligned} \langle \nabla_{\alpha} G(\alpha^t), \alpha_{FW}^t - \alpha^t \rangle &\leq \langle \nabla_{\alpha} G(\alpha^t), \alpha^* - \alpha^t \rangle \\ &\leq G^* - G(\alpha^t), \end{aligned}$$

where  $G^* := G(\alpha^*)$ . Together with (31), we have

$$\Delta G^{t+1} - \Delta G^t \leq \frac{-\gamma}{N} \Delta G^t + \frac{QR^2\gamma^2}{2N} \quad (32)$$

for any  $\gamma \in [0, 1]$ , where  $\Delta G^t := E[G(\alpha^t)] - G^*$ . By choosing  $\gamma = \frac{2N}{t+2N}$ , the recurrence (32) leads to the result

$$\Delta G^t \leq \frac{2(QR^2 + \Delta G^0)}{t/N + 2},$$

which can be verified via induction as in the proof of Lemma C.2 of (Lacoste-Julien et al., 2013).

<sup>4</sup><http://research.microsoft.com/en-us/um/people/manik/code/SLEEC/download.html>

### 6.2. Proof for Theorem 2

The approximation criteria (24) searches active label from one out of  $\nu$  partitions of  $[K]$ . Suppose in the  $t$ -th iteration, a subset not containing most-violating label (20) was chosen, we have

$$G(\alpha^{t+1}) - G(\alpha^t) \leq 0 \quad (33)$$

and suppose a subset containing most-violating label was chosen, we have

$$\begin{aligned} G(\alpha^{t+1}) - G(\alpha^t) &\leq \gamma \langle \nabla_{\alpha^i} G(\alpha^t), \alpha_{FW}^{it} - \alpha^{it} \rangle + \frac{Q_i R^2 \gamma^2}{2} + \gamma \epsilon_d \end{aligned} \quad (34)$$

where  $\epsilon_d$  is the error caused by sampling (25). Since (33), (34) happen with probabilities  $1-1/\nu$  and  $1/\nu$  respectively, we have expected descent amount

$$\begin{aligned} E[G(\alpha^{t+1}) - G^*] - (G(\alpha^t) - G^*) &\leq \frac{\gamma}{N\nu} \langle \nabla_{\alpha} G(\alpha^t), \alpha_{FW}^t - \alpha^t \rangle + \frac{QR^2\gamma^2}{2N\nu} + \frac{\gamma\epsilon_d}{\nu} \\ &\leq \frac{-\gamma}{N\nu} (G(\alpha^t) - G^*) + \frac{QR^2\gamma^2}{2N\nu} + \frac{\gamma\epsilon_d}{\nu}. \end{aligned} \quad (35)$$

following the same reasoning of (31) and (32). For

$$\epsilon_d \leq \frac{QR^2\gamma}{2N},$$

we have

$$\begin{aligned} E[G(\alpha^{t+1}) - G^*] - (G(\alpha^t) - G^*) &\leq \frac{-\gamma}{N\nu} (G(\alpha^t) - G^*) + \frac{QR^2\gamma^2}{N\nu}. \end{aligned} \quad (36)$$

Therefore, by choosing  $\gamma = \frac{2}{t/(N\nu)+2}$ , we have

$$\Delta G^t \leq \frac{4(QR^2 + \Delta G^0)}{t/(N\nu) + 2}$$

for  $t$  satisfying

$$0 \leq t \leq \nu QR^2 / \epsilon_d.$$

## 7. Appendix B: Additional Statistics

Table 4. Default parameter setting used in SLEEC’s code. One might need to refer to their webpage <sup>6</sup> for explanation of parameters.

| num_learners | num_clusters | SVP_neigh |
|--------------|--------------|-----------|
| 5            | 5            | 50        |
| out_Dim      | w_thresh     | sp_thresh |
| 75           | 0.75         | 0.5       |
| cost         | NNtest       | normalize |
| 0.1          | 20           | 1         |

Table 5. Statistics for heldout and test data set

| Data Sets    | Train Size | Heldout Size | Test Size. |
|--------------|------------|--------------|------------|
| LSHTC-wiki   | 2355436    | 5000         | 5000       |
| EUR-Lex      | 15643      | 1738         | 1933       |
| bibtex       | 5991       | 665          | 739        |
| RCV1-regions | 20835      | 2314         | 5000       |
| LSHTC        | 83805      | 5000         | 5000       |
| aloi.bin     | 90000      | 10000        | 8000       |
| Dmoz         | 310562     | 34506        | 38340      |
| ImageNet     | 1125264    | 10000        | 126140     |
| sector       | 7793       | 865          | 961        |

## 8. Appendix C: Bounds for Approximation

(25)

Let  $\sigma_{ki}^2$  be the variance of  $\bar{C}_k(\mathcal{D}_i)$ . We have

$$\sigma_{ki}^2 \leq \hat{\sigma}_{ki}^2 = \frac{1}{\bar{d}_i} \|\mathbf{x}_i\|_1 \|\mathbf{x}_i\|_\infty R_w^2 \leq \frac{d_i}{\bar{d}_i} \|\mathbf{x}_i\|_\infty^2 R_w^2 \quad (37)$$

, where  $R_w^2$  is an upper bound on  $\sum_{j:\mathbf{x}_{ij} \neq 0} (\mathbf{w}_{kj}^t)^2$ .

For  $\epsilon = O(\|\mathbf{x}_i\|_1 R_w)$ , Bernstein-Type inequality gives

$$\Pr[|\bar{C}_k(\mathcal{D}_i) - \langle \mathbf{w}_k^t, \mathbf{x}_i \rangle| > \epsilon] \leq e^{-\frac{\epsilon^2}{2\hat{\sigma}_{ki}^2}} \quad (38)$$

Suppose we want to approximate  $\langle \mathbf{w}_k^t, \mathbf{x}_i \rangle$  within  $\epsilon_d$  for all  $k \in [K]$  with failure probability at most  $\delta$ . Combining (37), (38) and using union bound, we only need

$$\frac{d_i}{\bar{d}_i} \lesssim \frac{\epsilon_d^2}{\log(\frac{K}{\delta}) \|\mathbf{x}_i\|_\infty^2 R_w^2} \quad (39)$$

Also, look at the dual objective function in (14), initially we have  $G(\boldsymbol{\alpha}) = G(\mathbf{0}) = 0$ . Since our method is dual-descent, we have  $G(\boldsymbol{\alpha}^t) \leq 0$ , thus

$$\frac{1}{2} \sum_{k=1}^K \|\mathbf{w}_k^t\|_2^2 \leq -\sum_{i=1}^N \mathbf{e}_i^T \boldsymbol{\alpha}^i \leq CN \quad (40)$$

where the last inequality follows from (16).
